1     ***In vivo* host-pathogen interaction as revealed by global proteomic**  
2                                   **profiling of zebrafish larvae**

3     Francisco Díaz-Pascual<sup>1</sup>, Javiera Ortíz-Severín<sup>1</sup>, Macarena A. Varas<sup>1</sup>, Miguel L. Allende<sup>2\*</sup> and  
4     Francisco P. Chávez<sup>1\*</sup>

5

6     <sup>1</sup>Laboratorio de Microbiología de Sistemas, Departamento de Biología, Facultad de Ciencias,  
7     Universidad de Chile.

8     <sup>2</sup>Centro FONDAF de Regulación del Genoma, Universidad de Chile.

9

10    **Running title:** Zebrafish-Pseudomonas *in vivo* interaction

11

12    \* Corresponding authors. Mailing addresses:

13    Dr. Miguel L. Allende  
14    Universidad de Chile  
15    Centro FONDAF de Regulación del Genoma  
16    Facultad de Ciencias  
17    Departamento de Biología  
18    Las Palmeras 3425, Ñuñoa, Santiago, 7800003, Chile.  
19    [allende@uchile.cl](mailto:allende@uchile.cl)

20

21

22    Dr. Francisco P. Chávez  
23    Universidad de Chile  
24    Facultad de Ciencias  
25    Departamento de Biología  
26    Laboratorio de Microbiología de Sistemas  
27    Las Palmeras 3425, Ñuñoa, Santiago, 7800003, Chile.  
28    [fpchavez@uchile.cl](mailto:fpchavez@uchile.cl)

29

30 **Abstract**

31 The outcome of a host-pathogen interaction is determined by the conditions of the host, the  
32 pathogen, and the environment. Although numerous proteomic studies of *in vitro*-grown  
33 microbial pathogens have been performed, *in vivo* proteomic approaches are still rare. In  
34 addition, increasing evidence supports that *in vitro* studies inadequately reflect *in vivo* conditions.  
35 Choosing the proper host is essential to detect the expression of proteins from the pathogen *in*  
36 *vivo*. Numerous studies have demonstrated the suitability of zebrafish (*Danio rerio*) embryos as a  
37 model to *in vivo* studies of *Pseudomonas aeruginosa* infection. In most zebrafish-pathogen  
38 studies, infection is achieved by microinjection of bacteria into the larvae. However, few reports  
39 using static immersion of bacterial pathogens have been published. In this study we infected 3  
40 days post-fertilization (DPF) zebrafish larvae with *P. aeruginosa* PAO1 by immersion and  
41 injection and tracked the *in vivo* immune response by the zebrafish. Additionally, by using non-  
42 isotopic (Q-exactive) metaproteomics we simultaneously evaluated the proteomic response of the  
43 pathogen (*P. aeruginosa* PAO1) and the host (zebrafish). We found some zebrafish metabolic  
44 pathways, such as hypoxia response via HIF activation pathway, exclusively enriched in the  
45 larvae exposed by static immersion. In contrast, we found that inflammation mediated by  
46 chemokine and cytokine signaling pathways was exclusively enriched in the larvae exposed by  
47 injection, while the integrin signaling pathway and angiogenesis were solely enriched in the  
48 larvae exposed by immersion. We also found important virulence factors from *P. aeruginosa* that  
49 were enriched only after exposure by injection, such as the Type-III secretion system and  
50 flagella-associated proteins. On the other hand, *P. aeruginosa* proteins involved in processes like  
51 biofilm formation, cellular responses to antibiotic and starvation were enriched exclusively after  
52 an exposure by immersion.

53 We demonstrated the suitability of zebrafish embryos as a model for *in vivo* host-pathogen based  
54 proteomic studies in *P. aeruginosa*. Our global proteomic profiling identifies novel molecular  
55 signatures that give systematic insight into zebrafish-*Pseudomonas* interaction.

56 **Keywords:** Q-exactive proteomic, Host-pathogen interaction, *Danio rerio*, Neutrophil response,  
57 *P. aeruginosa*.

58

## 59 **Introduction**

60 *Pseudomonas aeruginosa* is one of the most common opportunistic pathogens in humans,  
61 normally infecting patients wounded, burned, immunocompromised or with cystic fibrosis. Many  
62 surrogate host models have been used to study the pathogenesis of *P. aeruginosa*, such as plants,  
63 amoebas, insects, fish and mice (Brannon et al., 2009; Mahajan-Miklos, Rahme, & Ausubel,  
64 2000; Pukatzki, Kessin, & Mekalanos, 2002). Zebrafish (*Danio rerio*) combine the advantages of  
65 invertebrate and murine models. It has a similar immune system to that found in mammals, but  
66 without the costs and lab space requirements of murine models. It has a fully functional innate  
67 immune system in the first days of embryogenesis (Iwanami, 2014). However, the adaptive  
68 immune system is mature only after 4-6 weeks post-fertilization (Lam, Chua, Gong, Lam, & Sin,  
69 2004).

70 The real-time visualization capabilities and genetic tractability of the zebrafish infection  
71 model allow the elucidation of molecular and cellular features of *P. aeruginosa* pathogenesis  
72 while causing damage to the host. Neutrophils and macrophages can rapidly phagocytize and kill  
73 *P. aeruginosa* (Herbomel, Thisse, & Thisse, 1999; Le Guyader et al., 2008), suggesting that both  
74 immune cell types play a role in the defense against bacterial infection.

75 There are two main methods for the exposure of the zebrafish to a bacterial pathogen,  
76 injection and static immersion. The former involves the injection of the bacteria directly into the  
77 fish and in the latter the zebrafish is incubated in a bacterial suspension. It is still unclear if the  
78 responses of zebrafish exposed to *P. aeruginosa* by these two methods are similar. Moreover, in  
79 contrast with early stages of development, there is little information regarding the response of 3  
80 days post-fertilization (DPF) zebrafish larvae infected with this pathogen, age at which the innate  
81 immune system is already mature, the fish have left the corium and have opened their mouth.

82 A novel approach for host-pathogen studies on alternative models such as zebrafish  
83 infections is to study the whole spectrum of gene expression with techniques such as proteomics  
84 and transcriptomics. This enable us to recognize and analyze cellular processes from a global  
85 point of view and from these understand the molecular and cellular adjustments that occur during

86 infection in both the pathogen and the host. However, limited studies have combined the *in vivo*  
87 cellular responses and global proteomic changes during host-pathogen interaction.

88         The aim of this study was to compare host-pathogen interaction during immersion and  
89 injection methods of exposure of zebrafish larvae to *P. aeruginosa* PAO1, and to identify marker  
90 genes for the immune response and virulence factors important for the infection. For this we have  
91 compared the *in vivo* neutrophil response and the global proteomic profiling of zebrafish exposed  
92 to *P. aeruginosa* PAO1 through injection in the caudal artery and through static immersion. By  
93 using Q-Exactive Orbitrap Mass Spectrometry, the global metaproteomic profiling of 3 DPF  
94 zebrafish larvae inoculated by both methods of infection was compared. The global proteomic  
95 profiling approach with zebrafish larvae infected with this pathogen allows for simultaneous  
96 tracking of the global proteome changes in the host (zebrafish) and in the bacterial pathogen (*P.*  
97 *aeruginosa*). We demonstrate that the global proteomic profiling we employed is a strong  
98 platform for *in vivo* global host-microbe interaction studies in zebrafish.

## 99 **Materials and Methods**

### 100 **Zebrafish husbandry**

101 Zebrafish (*Danio rerio*) embryos were obtained by natural spawning of Tab5 and  
102 *Tg(BACmpo:mCherry)* lines (Renshaw et al., 2006). Fertilized eggs were raised in petri dishes  
103 containing E3 medium (5 mM NaCl, 0.17 mM KCl, 0.33 mM CaCl<sub>2</sub>, 0.3 mM MgSO<sub>4</sub>) and 0.1%  
104 methylene blue until 72 hours post-fertilization (HPF). All procedures complied with national  
105 guidelines and were approved by the Animal Use Ethics Committee of the University of Chile  
106 and the Bioethics Advisory Committee of Fondecyt-Conicyt (the funding agency for this work).

### 107 **Bacterial immersion and injection experiments**

108 *Pseudomonas aeruginosa* PAO1 was used for the injection and immersion assays.  
109 Avirulent *Escherichia coli* (strain DH5 $\alpha$ ) was used as a control. The bacteria were grown in LB  
110 medium overnight at 37°C and with shaking at 180 RPM. The cultures were washed and  
111 subsequently suspended in PGS medium (PGS ( $\downarrow$ Pi); 2.5 g/L peptone, 3 g/L NaCl, 1 mM  
112 MgSO<sub>4</sub>, 1 mM CaCl<sub>2</sub>, 2% glycerol, pH 6.0); these suspensions were used to inoculate a liquid  
113 culture in PGS medium or PGS medium supplemented with inorganic phosphate (PGS ( $\uparrow$ Pi); 25  
114 mM potassium phosphate buffer pH 6.0) in a 1:100 ratio. These cultures were grown at 37°C with  
115 shaking at 180 RPM for 18 hrs.

116 For the immersion assays (Varas et al., 2017), cultures were washed and re-suspended in  
117 E3 medium (5 mM NaCl, 0.17 mM KCl, 0.33 mM CaCl<sub>2</sub>, 0.33 mM MgSO<sub>4</sub>, pH 7.0), then  
118 adjusted to an optical density at 600 nm (OD<sub>600</sub>) of 1.4 equivalent to  $(1.1 \pm 0.23)E9$  CFU/mL for  
119 PGS ( $\downarrow$ Pi) and  $(1.1 \pm 0.22)E9$  CFU/mL for PGS ( $\uparrow$ Pi) for *P. aeruginosa* and equivalent to  $(1.2 \pm$   
120  $0.25)E9$  CFU/mL for PGS ( $\downarrow$ Pi) and  $(1.0 \pm 0.15)E9$  CFU/mL for PGS ( $\uparrow$ Pi) for *E. coli*. To  
121 determine CFU/mL, the bacterial suspensions were plated on LB-agar. Zebrafishes of 3 DPF  
122 were washed with sterile E3, and 10 larvae were placed per well in a 6 well plate. The wells were  
123 filled with the bacterial solution to obtain an adjusted OD<sub>600</sub> of 0.7, 0.525 and 0.35 within a final  
124 volume of 8 ml, corresponding to  $(5.5 \pm 0.22)E8$  CFU/mL,  $(4.1 \pm 0.20)E8$  CFU/mL,  $(2.8 \pm$   
125  $0.23)E8$  CFU/mL respectively. The zebrafish larvae were incubated at 20°C for 30 hrs.

126 For the injection assays, the bacterial cultures were washed and subsequently suspended  
127 in phosphate-buffered saline (PBS) and adjusted to an OD<sub>600</sub> of 5.0. Zebrafish of 3 DPF were  
128 anesthetized with 0.01% tricaine and mounted in low melting point agarose. The zebrafish were  
129 kept under anesthesia for the duration of bacterial injections. Between 2,000 and 6,000 CFU were  
130 injected into the caudal artery. To determine the CFU injected, the droplets were also injected in  
131 sterile PBS and plated on LB-agar. The injected zebrafish were kept at 20°C for 72 hours.

132 Survival curves were analyzed using the Kaplan–Meier method (GraphPad Prism version  
133 6.00 for Mac OS X, GraphPad Software, La Jolla California USA, [www.graphpad.com](http://www.graphpad.com)). All  
134 experiments were done in triplicate for a total of 30 larvae per condition.

### 135 **Inflammation mediated by neutrophils**

136 Recruitment of neutrophils was observed using the *Tg(BACmpo:mCherry)* zebrafish line.  
137 The larvae were observed using an Olympus MVX10 (Japan) fluorescence microscope at 2, 4, 7  
138 and 22 hours post-injection (HPI). To determine the number of neutrophils in circulation, injected  
139 *Tg(BACmpo:mCherry)* zebrafish larvae were anesthetized with 0.01% tricaine for 2 minutes and  
140 the number of neutrophils that passed through the site of injection by the caudal artery in one  
141 minute were counted. Statistical differences were assessed using a two-way ANOVA followed by  
142 Turkey's multiple comparisons test using GraphPad Prism version 6.00 for Mac OS X, GraphPad  
143 Software, La Jolla California USA, ([www.graphpad.com](http://www.graphpad.com)).

### 144 **Global proteomic profiling using Q-exactive mas spectrometry**

145 For the proteomic analysis we selected and froze samples in a dry methanol bath at -80°C,  
146 including: 10 larvae injected with 2,000-6,000 CFU of *P. aeruginosa* (grown in medium PGS  
147 (↓Pi)) at 22 HPI; 10 larvae injected with sterile PBS at 22 HPI; 10 larvae at 22 hours post-  
148 exposure (HPE) to ~2.5x10<sup>8</sup> CFU/mL of *P. aeruginosa* (grown in medium PGS (↑Pi)) by static  
149 immersion; and 10 larvae incubated for 22 hours in sterile E3 medium.

150 Global proteomic profiles were obtained by services from Bioproximity, LLC (USA).  
151 Protein denaturation, digestion and desalting of samples were prepared using the filter-assisted  
152 sample preparation (FASP) method (Wiśniewski, Zougman, Nagaraj, & Mann, 2009). Briefly,

153 the samples were digested using trypsin, and each digestion mixture was analyzed by UHPLC-  
154 MS/MS and a quadrupole-Orbitrap mass spectrometer (Q-Exactive, Thermo Fisher). Mass  
155 spectrometer RAW data files were compared with the most recent protein sequence libraries  
156 available from UniProtKB. Proteins were required to have 1 or more unique peptides across the  
157 analyzed samples with E-value scores of 0.0001 or less.

158 The differences between the proteome of the larvae injected with *P. aeruginosa* and PBS,  
159 and between the larvae exposed to *P. aeruginosa* by static immersion were determined.  
160 Significance cut-offs for the ratios were set at 1.5- fold change. The proteins up-regulated and  
161 down-regulated exclusively in one of the conditions were determined. Gene ontology (GO)  
162 analysis were performed using Panther web-based software (Mi, Muruganujan, Casagrande, &  
163 Thomas, 2013; Mi, Muruganujan, & Thomas, 2013). For enrichment analysis the cut of was set  
164 to P-value<0.05.

165 To analyze the *P. aeruginosa* proteome, proteins in the infected larvae but not in the  
166 respective control were analyzed using Panther web-based software and a cut-off set to P-  
167 value<0.05. For visualizing changes in the GO categories in both methods, Treemap (Version  
168 3.7.2 for Mac) were used for the hierarchical representation of enriched biological processes and  
169 cellular components. Items were grouped by category and their size was proportional to the P-  
170 value.

171 **Results**

172 **Neutrophil response toward *P. aeruginosa* PAO1 in zebrafish larvae after inoculation by**  
173 **microinjection and static immersion**

174 *P. aeruginosa* becomes more virulent when grown with limited inorganic phosphate (Pi)  
175 in the medium (Long, Zaborina, Holbrook, Zaborin, & Alverdy, 2008; Zaborin et al., 2012).  
176 Therefore, in order to obtain a wide range of outcomes to compare the injection and static  
177 immersion methods, the bacterial cells were grown in PGS medium lacking Pi or in the same  
178 medium supplemented with Pi, PGS ( $\downarrow$ Pi) or PGS ( $\uparrow$ Pi) respectively.

179 For the immersion assay, zebrafish larvae at 72 HPF were immersed in high  
180 concentrations of *P. aeruginosa* or *E. coli* (in the order of  $10^8$  CFU/ml) for 30 hours at 20°C.  
181 Mortality of zebrafish was observed when they were immersed with *P. aeruginosa*, but not with  
182 *E. coli* (Figures 1A and 1B). As expected, the larvae survival was dependent on the concentration  
183 of bacteria and the virulence of *P. aeruginosa* was increased when they were grown in Pi  
184 limitation. Before the death of the larvae, their tail was curved and there was damage and  
185 necrosis in the fins, tail and head (Figure 1C). Using the transgenic line *Tg(BACmpo:mCherry)*  
186 we did not find significant migration of neutrophils or changes in the distribution of these cells  
187 when the zebrafish was immersed with *P. aeruginosa* (Figure 1D).

188 The region of the caudal artery was chosen as the site of injection due to the reduced  
189 pigmentation in comparison to the caudal vein. Between 2,000-6,000 CFU of *P. aeruginosa* or *E.*  
190 *coli* cells were injected in zebrafish larvae at 72 HPF, and sterile PBS was injected as control.  
191 Under the tested conditions, death of the larvae was observed only when *P. aeruginosa* grown in  
192 PGS ( $\downarrow$ Pi) was injected (Figure 2A). Several larvae injected with *P. aeruginosa* presented  
193 damage and necrosis in the tail before their death (Figure 2B). In the first HPI, a circulatory  
194 blockage at the site of infection was observed when injected with *P. aeruginosa*, *E. coli* or sterile  
195 PBS. However, this blockage remained only for a few hours in the larvae injected with PBS  
196 sterile, but it was observable until 28 HPI in the larvae injected with *P. aeruginosa*.

197 In order to compare both methods of exposure and considering the absence of zebrafish  
198 mortality before 40 HPI, we address if in previous HPI there was some response in the larvae,



199 specifically an inflammatory response. To do so, a transgenic line that has the neutrophils marked  
200 with the fluorescent protein mCherry was used and injected with *P. aeruginosa*, *E. coli* or sterile  
201 PBS. In the larvae injected with *P. aeruginosa* there was a clear recruitment of neutrophils to the  
202 site on injection that remained until 28 HPI. This also occurred after an injection with sterile  
203 PBS, however under these conditions it was barely observable at 6 HPI and it was totally absent  
204 at 28 HPI (Figure 3B). These results suggest that an injection with *P. aeruginosa* generates an  
205 important inflammatory response at the site of injection. To quantify this, the number of  
206 neutrophils that passed through the site of injection in one minute was determined (Figure 3A). At  
207 22 HPI and 28 HPI there was a significant difference between the number of neutrophils  
208 circulating in the larvae injected with *P. aeruginosa* grown in PGS ( $\downarrow$ Pi) or injected with *E. coli*  
209 with respect to the control. In contrast, there was no difference between the larvae injected with  
210 *P. aeruginosa* grown in PGS ( $\uparrow$ Pi) with those injected with *E. coli*.

## 211 **Global proteomic profiling after infection by microinjection and static immersion**

212 First, the zebrafish proteomes were analyzed. The proteome profile of the larvae injected  
213 with *P. aeruginosa* was compared with larvae injected with sterile PBS (Figure 4A). A total of  
214 12,677 proteins were up-regulated (fold-change>1.5) and 13,292 proteins were significantly  
215 down-regulated (fold change <-1.5). From these, 8,575 proteins were up-regulated and 9,363  
216 proteins were down-regulated exclusively in this condition, and therefore not in the larvae  
217 exposed by immersion. On the other hand, when the proteome of the larvae immersed with *P.*  
218 *aeruginosa* was compared to the proteome of the larvae immersed in sterile E3 medium (control),  
219 a total of 13,607 proteins were up-regulated and 13,136 proteins were down-regulated. From  
220 these 9,505 proteins were up-regulated and 9,208 proteins were down-regulated exclusively in  
221 the larvae exposed by immersion.

222 The proteins up-regulated and down regulated in each condition were categorized  
223 according to GO-terms of biological process (Supplementary Files 1-3). No appreciable  
224 differences between the proteins up-regulated and down-regulated were found in each condition  
225 and neither between conditions in regard of biological process. The majority of the proteins were  
226 categorized under “metabolic process (GO:0008152)” and cellular process (GO:0009987)” with  
227 approximately 25% and 20% respectively in all the analysis. The GO-term “immune system

228 process (GO:0002376)” represented only around 5% of the proteins and the GO-term “response  
229 to stimulus” only around 6% of the proteins.

230 Afterwards, an overrepresentation test was carried out and the proteins were analyzed by  
231 Pathway (Table 1). In the up-regulated proteins of the larvae exposed by static immersion the  
232 “hypoxia response via HIF activation pathway (P00030)” was enriched. In contrast, in the down-  
233 regulated proteins of the larvae exposed by injection the categories “B cell activation (P00010)”  
234 and “endothelin signaling pathway (P00019)” were enriched. There were no significantly  
235 enriched groups in the up-regulated proteins by injection.

236 To address the differences in the proteins that changed their levels in one method of  
237 exposure but not in the other, the proteins up-regulated only in larvae exposed by injection or in  
238 larvae exposed by immersion were analyzed by Pathway. In the proteins up-regulated exclusively  
239 in injected larvae the pathways “axon guidance mediated by netrin (P00009)”, “inflammation  
240 mediated by chemokine and cytokine signaling pathway (P00031)” and “Cytoskeletal regulation  
241 by Rho GTPase (P00016)” were enriched. On the other hand, in the proteins up-regulated  
242 exclusively in the larvae exposed by immersion, “integrin signaling pathway” and “angiogenesis  
243 (P00005)” were enriched. No pathways were significantly enriched when proteins that were  
244 down-regulated exclusively in one of the conditions or the proteins that were up-regulated in both  
245 conditions were analyzed.

246 Several genes or gene products that have been reported as genetic markers for exposure to  
247 bacteria by injection were found in the zebrafish proteome (Figure 4B). Particularly, the levels of  
248 the transcripts of the *mmp9* and *il8l1* genes were reported as up-regulated in zebrafish after an  
249 exposure to *S. typhimurium* by injection (Stockhammer, Zakrzewska, Hegedus, Spaink, & Meijer,  
250 2009). However, neither of the proteins encoded by these genes were significantly up-regulated  
251 in larvae injected with *P. aeruginosa* at 22 HPI. IL-8L1 (N0GW19) was only detected in the  
252 larvae immersed with *P. aeruginosa* and in the larvae injected with PBS, but not in the control  
253 immersed in E3 medium or injected with *P. aeruginosa*. MMP9 (P14780) was slightly down-  
254 regulated (-2.04-fold change) in the larvae exposed by static immersion. The proteins IL-1 $\beta$   
255 (E0WCW4), TNF- $\beta$  (Q1JQ40), interferon-induced GTP-binding protein MxC (Q6DKF0),  
256 STAT1A and STAT1B were reported as molecular markers in zebrafish injected either with *S.*

257 *Typhimurium* (Stockhammer et al., 2009) or *E. tarda* (van Soest et al., 2011). We found all these  
258 proteins up-regulated in the larvae injected with *P. aeruginosa*. Interestingly, they were all down-  
259 regulated in the larvae immersed in *P. aeruginosa*, except for STAT1B (-1.24-fold change). In  
260 addition, IL-1 $\beta$  and TNF- $\alpha$  were reported as molecular markers for the response of the zebrafish  
261 injected at 50 HPF with *P. aeruginosa* PA14 into the yolk circulation valley (Clatworthy et al.,  
262 2009). Both proteins were up-regulated in our injection assay, but not in the larvae exposed by  
263 static immersion. These results suggest that the expression of known components in the response  
264 towards a bacterial injection is dependent on the types of pathogens infected. To our knowledge,  
265 the expression of *cyp1a* is the only proposed marker for an exposure by immersion to a *E. tarda*  
266 (van Soest et al., 2011). However, in this study CYP1A was only detected in the larvae incubated  
267 in sterile E3 medium.

268 To suggest potential novel molecular markers that are exclusive either for the injection or  
269 static immersion methods for exposure we look for proteins that fulfill the following conditions:  
270 (1) the protein should participate in pathways that are solely enriched in the larvae infected by  
271 one of the exposure methods, (2) the protein or its human homologue should have a known  
272 biological function related with an infective process and (3) the levels of protein expression be  
273 distinct in each method of exposure.

274 Considering these conditions, we suggest that proteins MYLKA, CHUK, CXCL11.6,  
275 CISH and IFIT5 can be used as novel molecular markers for the injection method (Figure 4B).  
276 MYLKA had a 16.7-fold change when it was compared to the control. CHUK was up-regulated in  
277 injected larvae (1.93-fold change). CXCL11.6 had a 5.30-fold change in injected larvae. IFIT5  
278 had a 121-fold change. The proteins COL8A2, COL141A, COL5A2B, VWA1, FYNA, FYNB,  
279 RAF1A and MAP2KA are potential novel markers for an infection by static immersion (Figure  
280 4B). These proteins were significantly up-regulated in the larvae exposed by static immersion and  
281 down-regulated in the injected larvae, except for MAP2KA that was not down-regulated in the  
282 injected larvae (1.14-fold change).

283 We next analyzed *P. aeruginosa* proteomes to address the differences in the proteins  
284 expressed in the *P. aeruginosa* injected and the *P. aeruginosa* in the immersion assay. A total of  
285 1,159 *P. aeruginosa* PAO1 proteins were exclusively found in the injected larvae, and 1,276 in

286 the larvae exposed by immersion (Supplementary Table 2). All of these proteins were analyzed  
287 by the GO-terms of component and biological process (Figure 5, Supplementary Table 3).  
288 Several GO-term categories associated with the bacterial-type flagellum were enriched in the *P.*  
289 *aeruginosa* injected, but not in the immersion assay. In regard of the GO-term by biological  
290 process, the categories “protein secretion by the type III secretion system” (GO:0030254),  
291 “bacterial-type flagellum organization” (GO:0044781), “putrescine metabolic process”  
292 (GO:0009445) and “response to drug” (GO:0042493) were enriched in the injected *P.*  
293 *aeruginosa*, but not in the immersion assay. On the other hand, the categories “single-species  
294 biofilm formation” (GO:0044010), “pathogenesis” (GO:0009405), “cellular response to  
295 antibiotic” (GO:0009267) and “cellular response to starvation” (GO:0009267) were enriched in  
296 the *P. aeruginosa* co-incubated with the zebrafish, but not in the injected bacteria. The categories  
297 “biological adhesion” (GO:0022610), “cellular response to stress” (GO:0033554), “pilus  
298 assembly” (GO:0009297), “biofilm formation” (GO:0042710), “cell communication”  
299 (GO:0007154), “type IV pilus-dependent motility” (GO:0043107), “cilium or flagellum-  
300 dependent cell motility” (GO:0001539), “protein secretion by the type II secretion system”  
301 (GO:0015628), “secondary metabolite biosynthetic process” (GO:0044550), “siderophore  
302 metabolic process” (GO:0009237), “pyoverdine metabolic process” (GO:0002048), “response to  
303 antibiotic” (GO:0046677) and “peptidoglycan metabolic process” (GO:0000270) were enriched  
304 in both groups of proteins (Supplementary Table 3).

305 To explain how these processes were regulated after an infection by injection or static  
306 immersion, the bacterial transcription regulators detected in the infected larvae but not in the  
307 respective controls were analyzed (Figure 5B). A total of 15 bacterial transcription regulator  
308 families were detected in the larvae injected with *P. aeruginosa* and in the larvae exposed by  
309 static immersion (LysR, LuxR, AraC, GntR, TetR, AsnC, XRE, Fis, DeoR, IclR, Cro/CI, HTH-  
310 type, ArsR, PvdS and AlpA), which suggest that several processes are regulated in a similar way  
311 in both methods of exposure. A total of 7 bacterial transcription factor families were detected  
312 only in the in the larvae injected with *P. aeruginosa* (RpiR, MvfR, Sigma-54 dependent family,  
313 PfeR, BvgA and RhlR). 12 bacterial transcription regulator families were detected only in the  
314 larvae in the larvae exposed by static immersion (PhoB, FleQ, AlgB, PtxS, MerR, ExsA, CopG,  
315 MarR, LacI, SoxR, ArsC, and DctD).



## 317 **Discussion**

318 Zebrafish has received increasingly strong support as a surrogate to murine models for  
319 infection research (Lieschke & Currie, 2007; Tobin, May, & Wheeler, 2012). To enable high-  
320 throughput screening, a simple infection method will provide numerous benefits. In this report we  
321 have compared the neutrophil response and global proteome profile of zebrafish larvae infected  
322 by static immersion in *P. aeruginosa* with the profiles of fish into which bacteria were directly  
323 injected.

324 The injection of bacteria into the zebrafish generated an inflammatory response, which  
325 was absent in larvae exposed by immersion. This was observed by an increase in the neutrophils  
326 in circulation and a strong neutrophil recruitment to the site of injection. This response was  
327 similar after an injection with *E. coli* or *P. aeruginosa* grown in PGS ( $\downarrow$ Pi). Although *E. coli* is  
328 non-virulent, it produces LPS, which causes an inflammatory response in the zebrafish upon  
329 exposure (Watzke, Schirmer, & Scholz, 2007). These results suggest that the zebrafish generates  
330 an immune response towards a bacterial injection by increasing the level of neutrophils in  
331 circulation. The injected larvae with *P. aeruginosa* grown in PGS ( $\downarrow$ Pi) were damaged,  
332 presenting necrosis in their tails. This effect has been already reported after injections of *P.*  
333 *aeruginosa* PAO1 into the caudal vein of zebrafish at 28 HPF (Llamas et al., 2009), which  
334 suggests that this phenotype is not exclusive for this site of infection or the age of the larvae fish.

335 All injected larvae also presented a circulatory blockage. However, this phenotype lasted  
336 longer if the injection was with *P. aeruginosa*. This phenomenon is not exclusive for an injection  
337 into the caudal artery, as it has been also observed when *P. aeruginosa* PAO1 was injected into  
338 the caudal vein of zebrafish embryos at 50 HPF; in this previously published case, circulatory  
339 blockage was caused by an aggregation of blood cells and bacteria (Brannon et al., 2009). Among  
340 the down-regulated proteins of the larvae exposed by injection, the B cell activation and  
341 endothelin signaling pathways were enriched. At this stage of development, the zebrafish does  
342 not have a functional adaptive immune system; therefore a decrease in the proteins related to the  
343 activation of B cell may be due to a regulation process in the precursors of this cell lineage. The  
344 endothelin signaling pathway is involved with blood pressure regulation, specifically by  
345 contracting the blood vessels (Marteau, Zaiou, Siest, & Visvikis-Siest, 2005). A decrease of the

346 proteins involved in this pathway could be a way to diminish the blood pressure produced by the  
347 damage and circulatory blockage generated by the bacterial injection.

348 On the other hand, in the larvae exposed by the immersion method, the hypoxia response  
349 via HIF activation pathway was enriched, which suggests that the larvae suffered from a lack of  
350 oxygen when exposed to *P. aeruginosa* by static immersion, possible caused by consumption of  
351 oxygen by the bacterial population and generation of compounds produced that diminish the  
352 percentage of dissolved oxygen, such as cyanide. Metabolic pathways related to angiogenesis  
353 were enriched, which could be due to the well-documented relation between hypoxia response  
354 and angiogenesis (Krock, Skuli, & Simon, 2011). Among down-regulated proteins, the integrin  
355 signaling pathway was enriched, which could be related to cell migration, especially to the  
356 epithelia. This pathway is involved in cell attachment, and down-regulation of this process could  
357 be a response against bacteria that are outside the fish or in contact with its skin.

358 Among the several host markers previously reported in zebrafish (Clatworthy et al., 2009;  
359 Stockhammer et al., 2009; van Soest et al., 2011), only IL-1 $\beta$  and TNF- $\alpha$  were found up-  
360 regulated in this study. This suggests that the zebrafish response depends on the host-pathogen  
361 interaction (e.g. age of the fish and pathogen). CYP1A, the only known marker for an exposure  
362 by immersion was not detected in the infected larvae. This could be explained since the  
363 expression of *cyp1a* had been reported as transient and mainly induced in the first hours of the  
364 exposure (van Soest et al., 2011).

365 For the injection method we suggest the proteins MYLKA, CHUK, CXCL11.6, CISH and  
366 IFIT5 as novel molecular markers for *P. aeruginosa* infection in zebrafish (Figure 4B). The  
367 human homologue of MYLKA is a calcium/calmodulin-dependent myosin light chain kinase,  
368 which is involved in the inflammatory response, and variants of this proteins increase the risk of  
369 acute lung injury (Gao et al., 2006). CHUK is involved in the macrophage inflammatory response  
370 toward LPS peritonitis in mouse (Kanaan et al., 2012), and it is important for functional  
371 maturation of dendritic cells (Mancino et al., 2013). CXCL11.6 is homologue of CXCL11 in  
372 humans, which is involved in the chemotaxis of interleukin activated T cells. In zebrafish this  
373 interleukin is involved in the macrophage recruitment after a mycobacteria infection (Torraca et  
374 al., 2015). The CISH homologue in humans is involved in the negative regulation of cytokines.



375 This protein was not detected in the larvae injected with *P. aeruginosa*, but it was detected in the  
376 larvae injected with PBS medium. This observation suggests that its diminished levels could be  
377 important for the zebrafish immune response. The expression of the gene *cish* was also  
378 diminished in catfish after bacterial infection (Yao et al., 2015). IFIT11, the zebrafish homologue  
379 of human IFIT15, is involved in the response toward an intramuscular viral injection in salmon  
380 (Chang, Robertsen, Sun, & Robertsen, 2014). Interestingly, its levels had a 121-fold change in  
381 the larvae injected with *P. aeruginosa*, which suggests that it also has a role towards a bacterial  
382 infection.

383 On the other hand, the proteins COL8A2, COL14A1, COL5A2B, VWA1, FYNA, FYNB,  
384 RAF1A and MAP2KA could act as novel markers for an infection by static immersion. The  
385 genes *col8a2*, *col14a1a* and *col5a2b* are homologues of genes that encode for collagen in mice  
386 and humans. Since after an exposure by static immersion there was damage of the skin and  
387 external membranes, these proteins could be involved in the zebrafish defense towards that kind  
388 of damage. COL8A2 is involved in cellular migration and integrity of blood vessels. Morpholino  
389 knock-down of COL14A1A provokes skin detachment in mice (Bader et al., 2013), and therefore  
390 is thought to be involved in maintaining the integrity of skin and membranes. Zebrafish *col5a2b*  
391 is homologue of *col5a2* in mice, which is involved in wound healing and in the *in vitro* response  
392 of macrophage toward *Porphyromonas gingivalis* infection (Richard et al., 2013). The human  
393 homologue of the gene *vwal* is hypothesized to be involved in extracellular matrix organization  
394 and behavioral response to pain. MAP2K4, the human homologue of MAP2K4A is required for  
395 maintaining peripheral lymphoid homeostasis and is involved in human gingival fibroblasts' *in*  
396 *vitro* response to *P. gingivalis* exposure (Herath et al., 2013). The gene *fyn*, a homologue of *fyna*  
397 and *fynb*, encodes a kinase involved in the control of cell growth, axon guidance, signaling by  
398 integrin, immune response and cellular migration. In mice *fyn* is expressed in T cells and is  
399 involved in T cell receptor signaling and production of interleukin 4 (Mamchak et al., 2008).  
400 RAF1, the human homologue of the protein encoded by *raf1a* in zebrafish, is involved in  
401 signaling pathways that regulate apoptosis, angiogenesis and cellular migration. RAF1A levels  
402 diminished when the zebrafish are challenged with a viral infection (Encinas et al., 2013).

403 In regard of the bacterial proteome, the LysR family was the family with more  
404 transcription regulator found in both group of larvae (41 proteins in the injected larvae and 31



405 proteins in the immersed larvae), which is expected since the LysR-type Regulator  
406 Transcriptional Regulators (LTTRs) are one of the largest and most abundant classes of  
407 transcription regulator in prokaryotes. They are involved in the regulation of motility,  
408 metabolism, quorum sensing and virulence (Maddocks & Oyston, 2008). MvfR is a LTTR and  
409 was only detected in the injected larvae (8 different proteins ID). It is involved pathogenesis by  
410 the biosynthesis the pyocyanin, elastase, phospholipase and quorum-sensing related molecules  
411 (Cao et al., 2001). AlgB is involved in the production of alginate and is necessary for the high  
412 production of this exopolysaccharide in mucoid strains (Wozniak & Ohman, 1991). In these  
413 proteomic results, AlgB was only detected in the larvae exposed by immersion. The production  
414 alginates protects the bacteria form antibiotics and from the host immune response (Leid et al.,  
415 2005).

416 Under the conditions tested in this study, the injection method is more suitable to study the  
417 response of the host towards a bacterial infection, because it generates an immune response by  
418 inflammation and neutrophil recruitment that do not fish subjected to the immersion method. In  
419 contrast, the latter method is preferable to study the bacterial pathogenesis due to simplicity and  
420 the easiness to modify the bacterial conditions, which is desired to study bacterial virulence.

421 Finally, our global proteomic approach allows for systematic searches for the virulence  
422 factors that *P. aeruginosa* expresses *in vivo* during the infection process. Several known virulence  
423 factors from *P. aeruginosa* PAO1 (Pukatzki et al., 2002) toxin production, type II secretion,  
424 quorum sensing, production of extracellular polymeric substances – among many others – were  
425 identified *in vivo* in our proteomic studies. This highlights the importance of using surrogate host  
426 models for large-scale infection and immunization studies that can be further investigated in  
427 murine models (Kurz and Ewbank, 2007).

428 In summary, our global proteomic profiling study of injected larvae indicates an  
429 inflammatory response, which does not occur among larvae subjected to immersion in medium  
430 colonized by the same pathogenic bacteria. Our data suggest that the immersion method may  
431 cause an epithelial or other tissue response towards molecules that are shed or secreted by *P.*  
432 *aeruginosa*. Particularly interesting is that the expression of several toxic pigments including  
433 siderophores was augmented exclusively in the infected zebrafish. Therefore, combining live cell

434 imaging with global proteomic profiling analysis in zebrafish larvae will be useful for future  
435 analysis of signal transduction pathways underlying host-pathogen interaction.

436

#### 437 **Conflict of interest statement**

438 The authors declare that the research was conducted in the absence of any commercial or  
439 financial relationships that could be construed as a potential conflict of interest.

440

#### 441 **Author contributions**

442 Conceived and designed the experiments: FDP and FC. Performed the experiments: FDP, MV  
443 and JOS. Analyzed the data: FDP, MV, JOS, MA and JOS. Contributed with  
444 reagents/animals/materials/analysis tools: FC and MA. Wrote the paper: FDP and FC. All authors  
445 read and approved the final manuscript.

#### 446 **Funding**

447 This work was supported by FONDECYT grant 1120209 (FC) and FONDAP Grant 15090007  
448 (MA). MV and JOS were supported by CONICYT fellowships 21120431 and 21130717  
449 respectively.

#### 450 **Acknowledgments**

451 We are indebted to Nicole Molina for technical support at SysmicroLab.

452 **References**

- 453 Bader, H. L., Lambert, E., Guiraud, A., Malbouyres, M., Driever, W., Koch, M., et al. (2013).  
454 Zebrafish collagen XIV is transiently expressed in epithelia and is required for proper  
455 function of certain basement membranes. *J. Biol. Chem.* 288, 6777–6787.  
456 doi:10.1074/jbc.M112.430637.
- 457 Bjornson, R. D., Carriero, N. J., Colangelo, C., Shifman, M., Cheung, K. H., Miller, P. L., et al.  
458 (2008). X!Tandem, an improved method for running X!Tandem in parallel on collections of  
459 commodity computers. *J. Proteome Res.* 7, 293–299. doi:10.1021/pr0701198.
- 460 Brannon, M. K., Davis, J. M., Mathias, J. R., Hall, C. J., Julia, C., Crosier, P. S., et al. (2009).  
461 *Pseudomonas aeruginosa* Type III secretion system interacts with phagocytes to modulate  
462 systemic infection of zebrafish embryos. *Cell. Microbiol.* 11, 755–768. doi:10.1111/j.1462-  
463 5822.2009.01288.x.
- 464 Cao, H., Krishnan, G., Goumnerov, B., Tsongalis, J., Tompkins, R., and Rahme, L. G. (2001). A  
465 quorum sensing-associated virulence gene of *Pseudomonas aeruginosa* encodes a LysR-like  
466 transcription regulator with a unique self-regulatory mechanism. *Proc. Natl. Acad. Sci.* 98,  
467 14613–14618. doi:10.1073/pnas.251465298.
- 468 Chambers, M. C., Maclean, B., Burke, R., Amodei, D., Ruderman, D. L., Neumann, S., et al.  
469 (2012). A cross-platform toolkit for mass spectrometry and proteomics. *Nat. Biotechnol.* 30,  
470 918–920. doi:10.1038/nbt.2377.
- 471 Chang, C.-J., Robertsen, C., Sun, B., and Robertsen, B. (2014). Protection of Atlantic salmon  
472 against virus infection by intramuscular injection of IFN $\gamma$  expression plasmid. *Vaccine* 32,  
473 4695–4702. doi:10.1016/j.vaccine.2014.05.059.
- 474 Clatworthy, A. E., Lee, J. S.-W., Leibman, M., Kostun, Z., Davidson, A. J., and Hung, D. T.  
475 (2009). *Pseudomonas aeruginosa* infection of zebrafish involves both host and pathogen  
476 determinants. *Infect. Immun.* 77, 1293–1303. doi:10.1128/IAI.01181-08.
- 477 Consortium, T. U. (2014). UniProt: a hub for protein information. *Nucleic Acids Res.* 43, D204–  
478 D212. doi:10.1093/nar/gku989.

- 479 Craig, R., and Beavis, R. C. (2004). TANDEM: Matching proteins with tandem mass spectra.  
480 *Bioinformatics* 20, 1466–1467. doi:10.1093/bioinformatics/bth092.
- 481 Encinas, P., Garcia-Valtanen, P., Chinchilla, B., Gomez-Casado, E., Estepa, A., and Coll, J.  
482 (2013). Identification of multipath genes differentially expressed in pathway-targeted  
483 microarrays in zebrafish infected and surviving Spring Viremia Carp Virus (SVCV) suggest  
484 preventive drug candidates. *PLoS One* 8, e73553. doi:10.1371/journal.pone.0073553.
- 485 Gao, L., Grant, A., Halder, I., Brower, R., Sevransky, J., Maloney, J. P., et al. (2006). Novel  
486 Polymorphisms in the myosin light chain kinase gene confer risk for acute lung injury. *Am.*  
487 *J. Respir. Cell Mol. Biol.* 34, 487–495. doi:10.1165/rcmb.2005-0404OC.
- 488 Geer, L. Y., Markey, S. P., Kowalak, J. a, Wagner, L., Xu, M., Maynard, D. M., et al. (2004).  
489 Open Mass Spectrometry Search Algorithm research articles. *J. Proteome Res.*, 958–964.
- 490 Le Guyader, D., Redd, M. J., Colucci-Guyon, E., Murayama, E., Kissa, K., Briolat, V., et al.  
491 (2008). Origins and unconventional behavior of neutrophils in developing zebrafish. *Blood*  
492 111, 132–141. doi:10.1182/blood-2007-06-095398.
- 493 Herath, T. D. K., Darveau, R. P., Seneviratne, C. J., Wang, C.-Y., Wang, Y., and Jin, L. (2013).  
494 Tetra- and penta-acylated lipid A structures of *Porphyromonas gingivalis* LPS differentially  
495 activate TLR4-mediated NF- $\kappa$ B signal transduction cascade and immuno-inflammatory  
496 response in human gingival fibroblasts. *PLoS One* 8, e58496.  
497 doi:10.1371/journal.pone.0058496.
- 498 Herbomel, P., Thisse, B., and Thisse, C. (1999). Ontogeny and behaviour of early macrophages  
499 in the zebrafish embryo. *Development* 126, 3735–3745.
- 500 Iwanami, N. (2014). Zebrafish as a model for understanding the evolution of the vertebrate  
501 immune system and human primary immunodeficiency. *Exp. Hematol.* 42, 697–706.  
502 doi:10.1016/j.exphem.2014.05.001.
- 503 Kanaan, Z., Gardner, S., Carruba, C., Mattingly, J., Druen, D., and Cheadle, W. G. (2012).  
504 Macrophage genetic reprogramming during chronic peritonitis is augmented by LPS  
505 pretreatment. *J. Surg. Res.* 175, 289–297. doi:10.1016/j.jss.2011.04.051.

- 506 Krock, B. L., Skuli, N., and Simon, M. C. (2011). Hypoxia-induced angiogenesis: good and evil.  
507 *Genes Cancer* 2, 1117–1133. doi:10.1177/1947601911423654.
- 508 Kurz, C. L., and Ewbank, J. J. (2007). Infection in a dish: high-throughput analyses of bacterial  
509 pathogenesis. *Curr. Opin. Microbiol.* 10, 10–16. doi:10.1016/j.mib.2006.12.001.
- 510 Lam, S. H., Chua, H. L., Gong, Z., Lam, T. J., and Sin, Y. M. (2004). Development and  
511 maturation of the immune system in zebrafish, *Danio rerio*: A gene expression profiling, in  
512 situ hybridization and immunological study. *Dev. Comp. Immunol.* 28, 9–28.  
513 doi:10.1016/S0145-305X(03)00103-4.
- 514 Leid, J. G., Willson, C. J., Shirliff, M. E., Hassett, D. J., Parsek, M. R., and Jeffers, A. K. (2005).  
515 The Exopolysaccharide Alginate Protects *Pseudomonas aeruginosa* Biofilm Bacteria from  
516 IFN- $\gamma$ -Mediated Macrophage Killing. *J. Immunol.* 175, 7512–7518.  
517 doi:10.4049/jimmunol.175.11.7512.
- 518 Lieschke, G. J., and Currie, P. D. (2007). Animal models of human disease: zebrafish swim into  
519 view. *Nat. Rev. Genet.* 8, 353–367. doi:10.1038/nrg2091.
- 520 Llamas, M. a., Van Der Sar, A., Chu, B. C. H., Sparrius, M., Vogel, H. J., and Bitter, W. (2009).  
521 A novel extracytoplasmic function (ECF) sigma factor regulates virulence in *Pseudomonas*  
522 *aeruginosa*. *PLoS Pathog.* 5. doi:10.1371/journal.ppat.1000572.
- 523 Long, J., Zaborina, O., Holbrook, C., Zaborin, A., and Alverdy, J. (2008). Depletion of intestinal  
524 phosphate after operative injury activates the virulence of *P. aeruginosa* causing lethal gut-  
525 derived sepsis. *Surgery* 144, 189–197. doi:10.1016/j.surg.2008.03.045.
- 526 MacLean, B., Eng, J. K., Beavis, R. C., and McIntosh, M. (2006). General framework for  
527 developing and evaluating database scoring algorithms using the TANDEM search engine.  
528 *Bioinformatics* 22, 2830–2832. doi:10.1093/bioinformatics/btl379.
- 529 Maddocks, S. E., and Oyston, P. C. F. (2008). Structure and function of the LysR-type  
530 transcriptional regulator (LTTR) family proteins. *Microbiology* 154, 3609–3623.  
531 doi:10.1099/mic.0.2008/022772-0.

- 532 Mahajan-Miklos, S., Rahme, L. G., and Ausubel, F. M. (2000). Elucidating the molecular  
533 mechanisms of bacterial virulence using non-mammalian hosts. *Mol. Microbiol.* 37, 981–  
534 988. doi:10.1046/j.1365-2958.2000.02056.x.
- 535 Mamchak, A. a, Sullivan, B. M., Hou, B., Lee, L. M., Gilden, J. K., Krummel, M. F., et al.  
536 (2008). Normal development and activation but altered cytokine production of Fyn-deficient  
537 CD4+ T cells. *J. Immunol.* 181, 5374–5385. doi:10.4049/jimmunol.181.8.5374.
- 538 Mancino, A., Habbedine, M., Johnson, E., Luron, L., Bebien, M., Memet, S., et al. (2013). I  
539 kappa B kinase alpha (IKK $\alpha$ ) activity is required for functional maturation of dendritic cells  
540 and acquired immunity to infection. *EMBO J.* 32, 816–828. doi:10.1038/emboj.2013.28.
- 541 Marteau, J. B., Zaiou, M., Siest, G., and Visvikis-Siest, S. (2005). Genetic determinants of blood  
542 pressure regulation. *J Hypertens* 23, 2127–2143.
- 543 Mi, H., Muruganujan, A., Casagrande, J. T., and Thomas, P. D. (2013a). Large-scale gene  
544 function analysis with the PANTHER classification system. *Nat. Protoc.* 8, 1551–66.  
545 doi:10.1038/nprot.2013.092.
- 546 Mi, H., Muruganujan, A., and Thomas, P. D. (2013b). PANTHER in 2013: Modeling the  
547 evolution of gene function, and other gene attributes, in the context of phylogenetic trees.  
548 *Nucleic Acids Res.* 41, 377–386. doi:10.1093/nar/gks1118.
- 549 Pukatzki, S., Kessin, R. H., and Mekalanos, J. J. (2002). The human pathogen *Pseudomonas*  
550 *aeruginosa* utilizes conserved virulence pathways to infect the social amoeba *Dictyostelium*  
551 *discoideum*. *Proc. Natl. Acad. Sci. U. S. A.* 99, 3159–3164. doi:10.1073/pnas.052704399.
- 552 Rappsilber, J., Mann, M., and Ishihama, Y. (2007). Protocol for micro-purification, enrichment,  
553 pre-fractionation and storage of peptides for proteomics using StageTips. *Nat. Protoc.* 2,  
554 1896–1906.
- 555 Renshaw, S. a, Loynes, C. a, Trushell, D. M. I., Elworthy, S., Ingham, P. W., and Whyte, M. K.  
556 B. (2006). A transgenic zebrafish model of neutrophilic inflammation. *Blood* 108, 3976–  
557 3978. doi:10.1182/blood-2006-05-024075.

- 558 Richard, G., Trivedi, N., Belta, C., and Amar, S. (2013). Partial restoration of macrophage  
559 alteration from diet-induced obesity in response to *Porphyromonas gingivalis* infection.  
560 *PLoS One* 8, e70320. doi:10.1371/journal.pone.0070320.
- 561 Slotta, D. J., McFarland, M. a., and Markey, S. P. (2010). MassSieve: Panning MS/MS peptide  
562 data for proteins. *Proteomics* 10, 3035–3039. doi:10.1002/pmic.200900370.
- 563 van Soest, J. J., Stockhammer, O. W., Ordas, A., Bloemberg, G. V., Spaink, H. P., and Meijer, A.  
564 H. (2011). Comparison of static immersion and intravenous injection systems for exposure  
565 of zebrafish embryos to the natural pathogen *Edwardsiella tarda*. *BMC Immunol.* 12, 58.  
566 doi:10.1186/1471-2172-12-58.
- 567 Stockhammer, O. W., Zakrzewska, A., Hegedûs, Z., Spaink, H. P., and Meijer, A. H. (2009).  
568 Transcriptome profiling and functional analyses of the zebrafish embryonic innate immune  
569 response to Salmonella infection. *J. Immunol.* 182, 5641–5653.  
570 doi:10.4049/jimmunol.0900082.
- 571 Sturm, M., Bertsch, A., Gröpl, C., Hildebrandt, A., Hussong, R., Lange, E., et al. (2008).  
572 OpenMS – An open-source software framework for mass spectrometry. *BMC*  
573 *Bioinformatics* 9, 163. doi:10.1186/1471-2105-9-163.
- 574 Tobin, D. M., May, R. C., and Wheeler, R. T. (2012). Zebrafish: a see-through host and a  
575 fluorescent toolbox to probe host–pathogen interaction. *PLoS Pathog* 8, e1002349.  
576 doi:10.1371/journal.ppat.1002349.
- 577 Torraca, V., Cui, C., Boland, R., Bebelman, J.-P., van der Sar, a. M., Smit, M. J., et al. (2015).  
578 The CXCR3-CXCL11 signaling axis mediates macrophage recruitment and dissemination of  
579 mycobacterial infection. *Dis. Model. Mech.* 8, 253–269. doi:10.1242/dmm.017756.
- 580 Varas, M., Farina, A., Diaz-Pascual, F., Ortiz-Severin, J., Marcoleta, A. E., Allende, M. L., et al.  
581 (2017). Live-cell imaging of *Salmonella Typhimurium* interaction with zebrafish larvae after  
582 injection and immersion delivery methods. *J. Microbiol. Methods* 135, 20–25.  
583 doi:10.1016/j.mimet.2017.01.020.
- 584 Watzke, J., Schirmer, K., and Scholz, S. (2007). Bacterial lipopolysaccharides induce genes

- 585 involved in the innate immune response in embryos of the zebrafish (*Danio rerio*). *Fish*  
586 *Shellfish Immunol.* 23, 901–905. doi:10.1016/j.fsi.2007.03.004.
- 587 Wisniewski, J. R., Zougman, A., Nagaraj, N., and Mann, M. (2009). Universal sample  
588 preparation method for proteome analysis. *Nat Meth* 6, 359–362.
- 589 Wozniak, D. J., and Ohman, D. E. (1991). *Pseudomonas aeruginosa* AlgB, a two-component  
590 response regulator of the NtrC family, is required for algD transcription. *J. Bacteriol.* 173,  
591 1406–13.
- 592 Yao, J., Mu, W., Liu, S., Zhang, J., Wen, H., and Liu, Z. (2015). Identification, phylogeny and  
593 expression analysis of suppressors of cytokine signaling in channel catfish. *Mol. Immunol.*  
594 64, 276–284. doi:10.1016/j.molimm.2014.12.003.
- 595 Zaborin, A., Gerdes, S., Holbrook, C., Liu, D. C., Zaborina, O. Y., and Alverdy, J. C. (2012).  
596 *Pseudomonas aeruginosa* overrides the virulence inducing effect of opioids when it senses  
597 an abundance of phosphate. *PLoS One* 7. doi:10.1371/journal.pone.0034883.
- 598



599 **Tables**

600  
 601 **Table 1. Overrepresentation test of proteins up-regulated or down-regulated in larvae**  
 602 **exposed to *P. aeruginosa* according to Pathway.** Up-regulated and down-regulated proteins in  
 603 zebrafish injected with *P. aeruginosa* PAO1 or co-incubated with *P. aeruginosa* PAO1, with  
 604 respect to the controls, were analyzed according to Pathway.

| <b>Pathway</b>                                                           | <b>Proteins found</b> | <b>Expected proteins</b> | <b>Fold enrichment</b> | <b>P-value</b> |
|--------------------------------------------------------------------------|-----------------------|--------------------------|------------------------|----------------|
| <b>Proteins up-regulated in zebrafish exposed by immersion</b>           |                       |                          |                        |                |
| <b>Hypoxia response via HIF activation</b>                               | 21                    | 8.15                     | 2.58                   | 1.90E-02       |
| <b>Proteins down-regulated in zebrafish exposed by immersion</b>         |                       |                          |                        |                |
| <b>Integrin signaling pathway</b>                                        | 64                    | 40.03                    | 1.6                    | 4.41E-02       |
| <b>Proteins down-regulated in injected zebrafish</b>                     |                       |                          |                        |                |
| <b>B cell activation</b>                                                 | 34                    | 16.34                    | 2.08                   | 1.38E-02       |
| <b>Endothelin signaling pathway</b>                                      | 41                    | 22.61                    | 1.81                   | 4.96E-02       |
| <b>Proteins up-regulated only in injected zebrafish</b>                  |                       |                          |                        |                |
| <b>Axon guidance mediated by netrin</b>                                  | 21                    | 6.95                     | 3.02                   | 2.03E-03       |
| <b>Cytoskeletal regulation by Rho GTPase</b>                             | 32                    | 16.13                    | 1.98                   | 4.83E-02       |
| <b>Inflammation mediated by chemokine and cytokine signaling pathway</b> | 58                    | 34.34                    | 1.69                   | 2.11E-02       |
| <b>Proteins up-regulated only in zebrafish exposed by immersion</b>      |                       |                          |                        |                |
| <b>Integrin signaling pathway</b>                                        | 50                    | 28.91                    | 1.73                   | 3.49E-02       |
| <b>Angiogenesis</b>                                                      | 53                    | 31.28                    | 1.69                   | 3.73E-02       |

605

606 **Figure Legends**

607  
608 **Figure 1. Zebrafish larvae exposed to *P. aeruginosa* by static immersion.** Larvae were  
609 immersed at 72 HPF in *P. aeruginosa* PAO1, *E. coli* DH5 $\alpha$  or in sterile E3 medium as control.  
610 (A, B) Survival curve of 72 HPF larvae immersed in different suspensions *P. aeruginosa* PAO1  
611 (green, blue and red) or in a suspension of *E. coli* DH5 $\alpha$  (light blue line) or in sterile E3 medium  
612 (black dotted line). In (A) the bacteria were grown in PGS ( $\downarrow$ Pi) medium. In (B) the bacteria were  
613 grown in PGS ( $\uparrow$ Pi) medium. (C) Larvae immersed with  $\sim 5 \times 10^8$  CFU/mL of *P. aeruginosa*  
614 PAO1 grown in PGS ( $\downarrow$ Pi) medium (upper and second picture) or in sterile E3 medium (bottom  
615 picture) at 3 hpe. (D) *Tg(BACmpo:mCherry)* larvae immersed at 72 HPF in  $\sim 2,5 \times 10^8$  CFC/mL of  
616 *P. aeruginosa* PAO1 grown in ( $\uparrow$ Pi) medium (left) or in sterile E3 medium (right) at 22 hpe.  
617 Scale A-B: 100  $\mu$ m.

618  
619 **Figure 2. Zebrafish larvae exposed to *P. aeruginosa* by injection.** Larvae were injected at 72  
620 HPF with 2,000-6,000 CFU of *P. aeruginosa* PAO1 or *E. coli* DH5 $\alpha$  into the caudal artery.  
621 Sterile PBS was injected as control. (A) Survival curve of 3 DPF larvae injected with *P.*  
622 *aeruginosa* PAO1 grown in PGS ( $\downarrow$ Pi) medium (green line), *P. aeruginosa* PAO1 grown in PGS  
623 ( $\uparrow$ Pi) medium (red dashed line), *E. coli* DH5 $\alpha$  (blue line) or sterile PBS medium (black dotted  
624 line). (B) Larvae injected at 72 HPF with *P. aeruginosa* PAO1 grown in PGS ( $\downarrow$ Pi) medium (left)  
625 or injected with sterile PBS medium (right) at 28 HPI. Scale: 100  $\mu$ m.

626  
627 **Figure 3. Inflammation mediated by neutrophils in injected zebrafish.**  
628 *Tg(BACmpo:mCherry)* larvae were injected at 72 HPF with 2,000-6,000 CFU of *P. aeruginosa*  
629 PAO1 or *E. coli* DH5 $\alpha$  into the caudal artery. Sterile PBS was injected as control. (A) Larvae  
630 were injected with *P. aeruginosa* PAO1 grown in PGS ( $\downarrow$ Pi) medium (red), *P. aeruginosa* PAO1  
631 grown in PGS ( $\uparrow$ Pi) medium (green), *E. coli* DH5 $\alpha$  (light blue) or sterile PBS medium (blue).  
632 Neutrophils that passed through the site of injection by the caudal artery in one minute at 2, 4, 7,  
633 22 and 28 HPI were counted. Each symbol represents a different zebrafish larva. Statistical  
634 differences with the control were determined. \*  $P \leq 0.05$ . \*\*\*\*  $P \leq 0.0001$ . (B)  
635 *Tg(BACmpo:mCherry)* larvae injected at 72 hpf with *P. aeruginosa* grown in PGS ( $\downarrow$ Pi) medium  
636 or sterile PBS medium were imaged at 6 and 28 HPI at the site of injection. Scale: 100  $\mu$ m

637  
638 **Figure 4. Proteins up-regulated and down regulated according to method of exposure and**  
639 **molecular markers proposed.** (A) Number of proteins up-regulated (right) or down-regulated  
640 (left) in zebrafish exposed at 72 HPF to *P. aeruginosa* PAO1 by injection (inside red circle) or  
641 static immersion (inside blue circle) at 22 hpe. (B) Molecular markers proposed for a *P.*  
642 *aeruginosa* PAO1 infection by injection (orange) or by static immersion (green) in 3 DPF  
643 zebrafish. In black there are the markers previously reported for other bacterial pathogens. The  
644 category displayed for the markers was determined using the homologous gene in human.

645  
646 **Figure 5. *P. aeruginosa* proteins exclusively found in zebrafish infected by injection (A) or**  
647 **by static immersion.** Treemap of the overrepresentation analysis of *P. aeruginosa* proteins  
648 exclusively found in zebrafish infected by injection (A) or by static immersion (B). (C)  
649 Representation of transcription factors detected among these exclusively found proteins in each  
650 method. The size of each group is proportional to the P-value. List of proteins were categorized  
651 by biological process (GO). The cut-off was set at  $P < 0.05$ .

652 **Supplementary Material**

653

654 **Supplementary Table 1. Overrepresentation test of proteins up-regulated and down-**  
655 **regulated in larvae exposed to *P. aeruginosa* according to Biological process.** The up-  
656 regulated and down-regulated proteins in zebrafish injected with *P. aeruginosa* PAO1 or co-  
657 incubated with *P. aeruginosa* PAO1, with respect to the controls, were analyzed according to  
658 Biological Process. The cut of was set to P-value<0.05

659

660 **Supplementary Table 2. Lists of *P. aeruginosa* proteins exclusively found in zebrafish**  
661 **infected by injection (Tab 1) or by static immersion (Tab 3).** List of transcription factors  
662 detected among these proteins (Tab 3 corresponds to injection Tab4 to immersion). The proteins  
663 are accompanied by their gene name, description, average intensity, expected value, tax id from  
664 the NCBI database and KEGG database.

665

666 **Supplementary Figure 1. GO annotation of up-regulated and down-regulated proteins in**  
667 **zebrafish exposed to *P. aeruginosa* by injection or static immersion.** Proteins significantly  
668 changed at 22 hpe in zebrafish exposed at 72 HPF by injection or static immersion with *P.*  
669 *aeruginosa* PAO1 were categorized by biological process (GO). The total represents the total  
670 matches in the database.

671

672 **Supplementary Figure 2. Overrepresentation analysis for proteins changed only in injection**  
673 **method.** Up-regulated (top) or down-regulated (bottom) proteins at 22 HPI in zebrafish exposed  
674 at 72 HPF by injection (but not in larvae exposed by immersion) categorized by biological  
675 process (GO). Blue bars indicate number of proteins. Red bars indicate fold enrichment. The cut-  
676 off was set at P<0.05. Only the more relevant groups are presented. Proc. = processing. Pres. =  
677 presentation.

678

679 **Supplementary Figure 3. Overrepresentation analysis for proteins changed only in**  
680 **immersion method.** Up-regulated (top) or down-regulated (bottom) proteins at 22 hpe in  
681 zebrafish exposed at 72 HPF by immersion (but not in larvae exposed by injection) categorized  
682 by biological process (GO). Blue bars indicate number of proteins. Red bars indicate fold

683 enrichment. The cut-off was set at  $P < 0.05$ . Only the more relevant groups are presented. Reg. =

684 regulation.

685

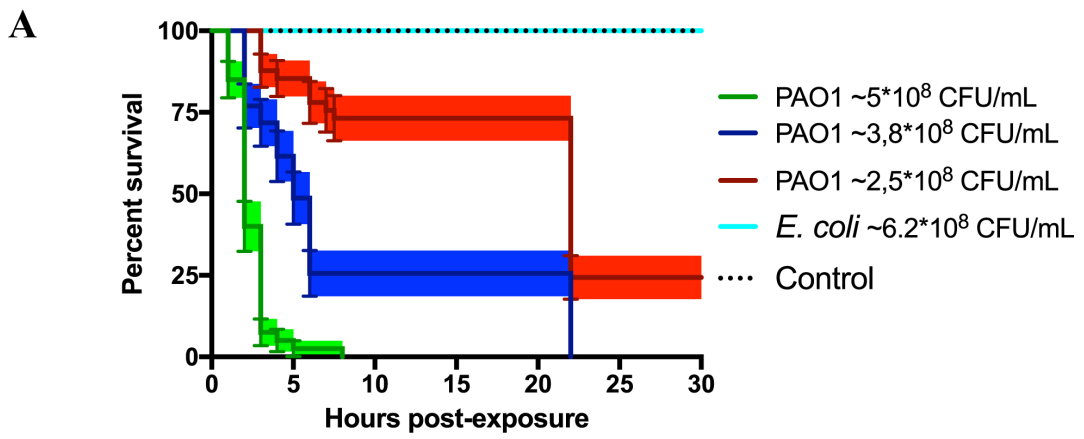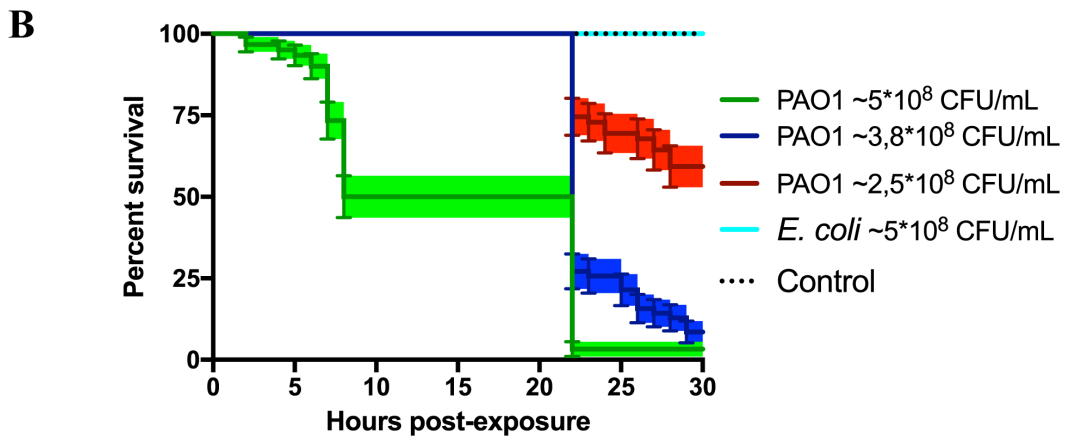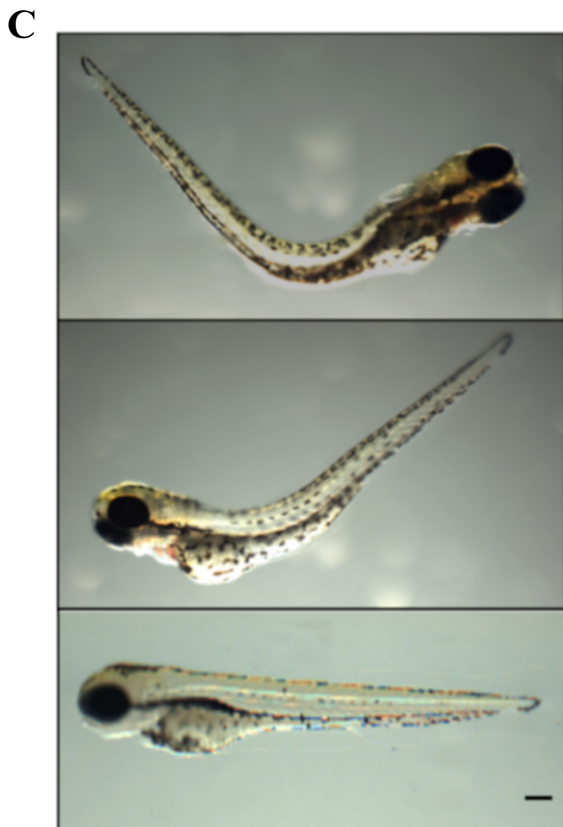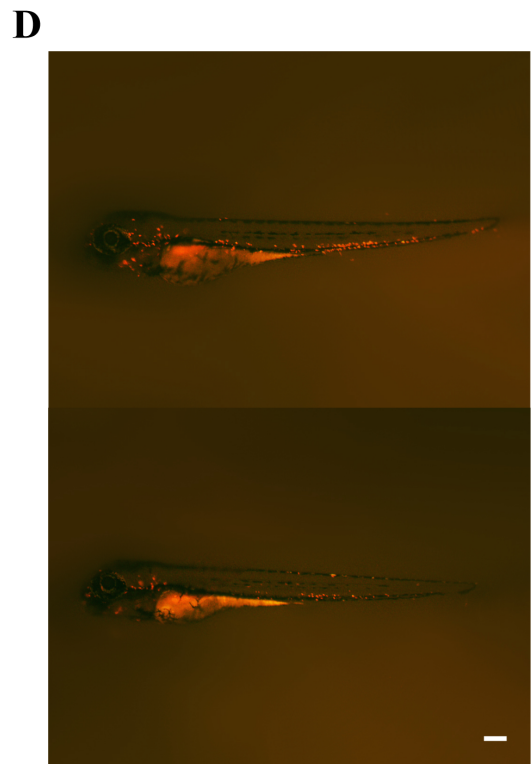

Figure 1

A

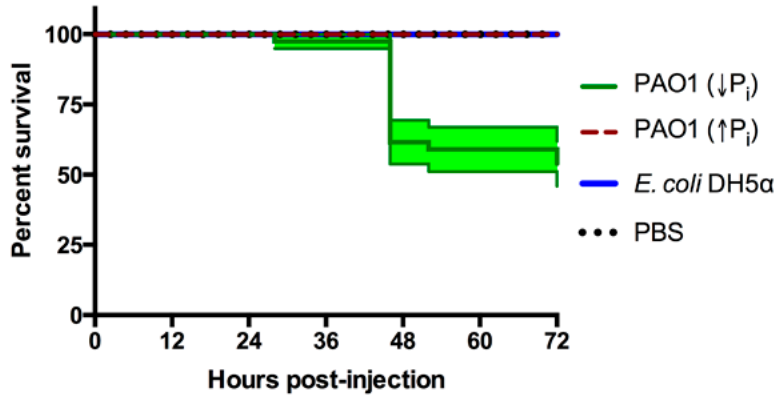

B

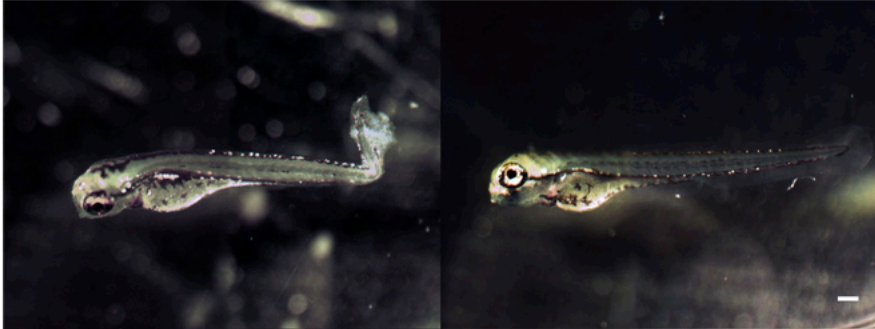

Figure 2

**A**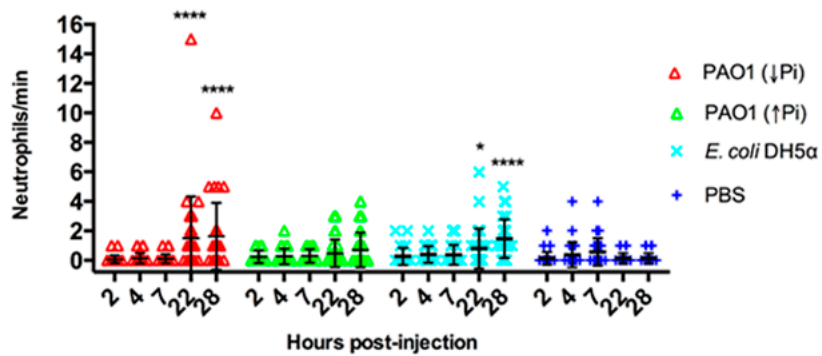**B**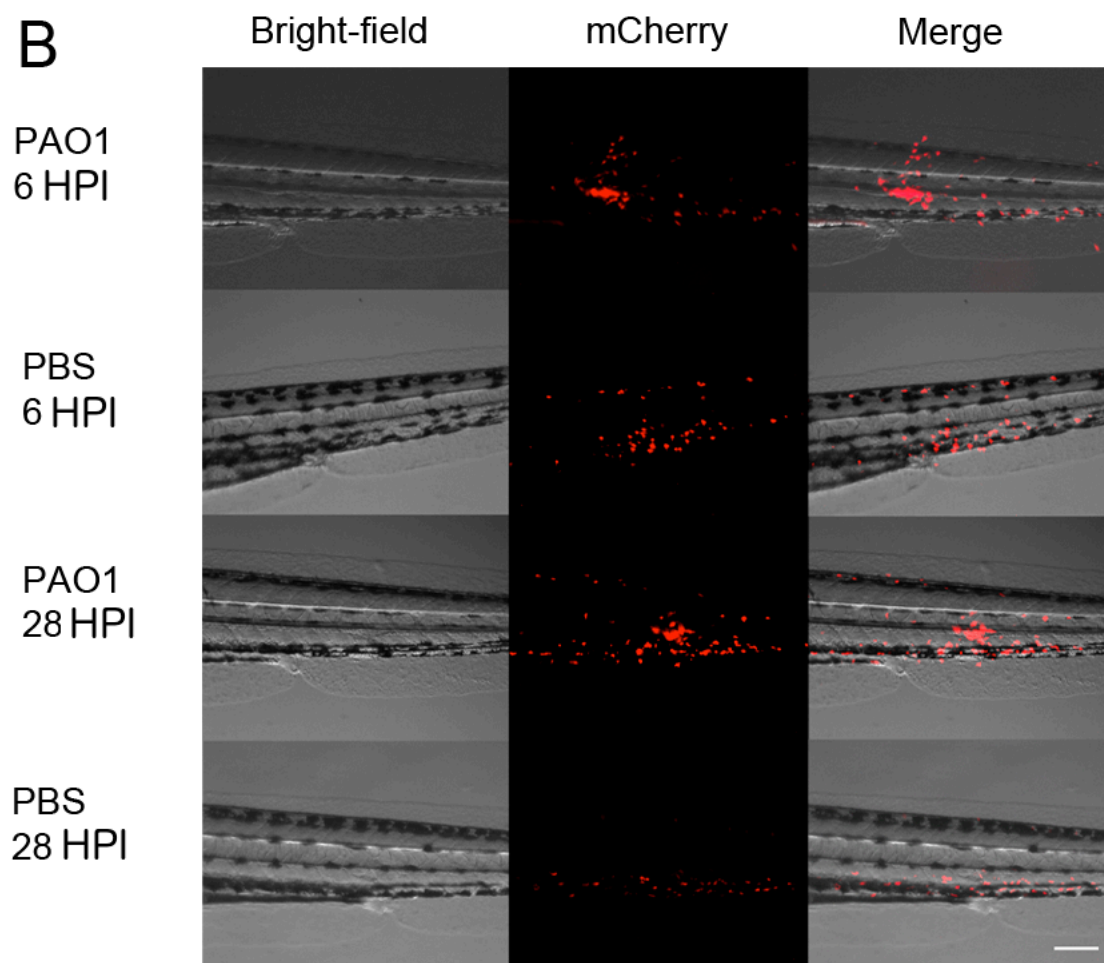

Figure 3



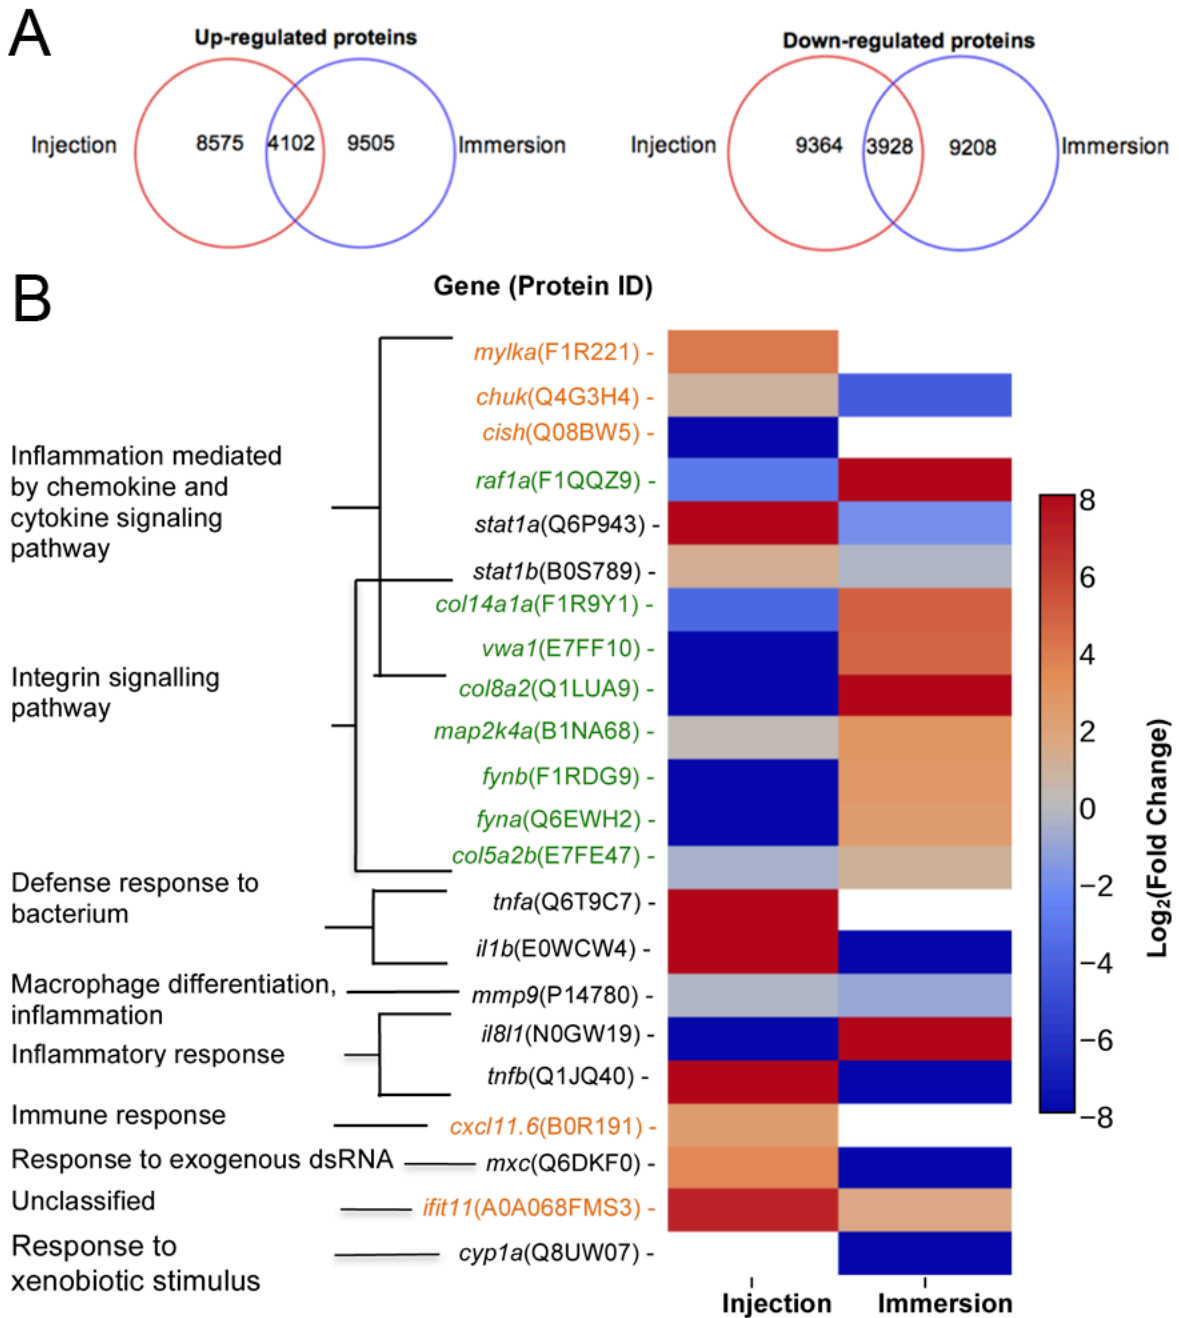

Figure 4

A

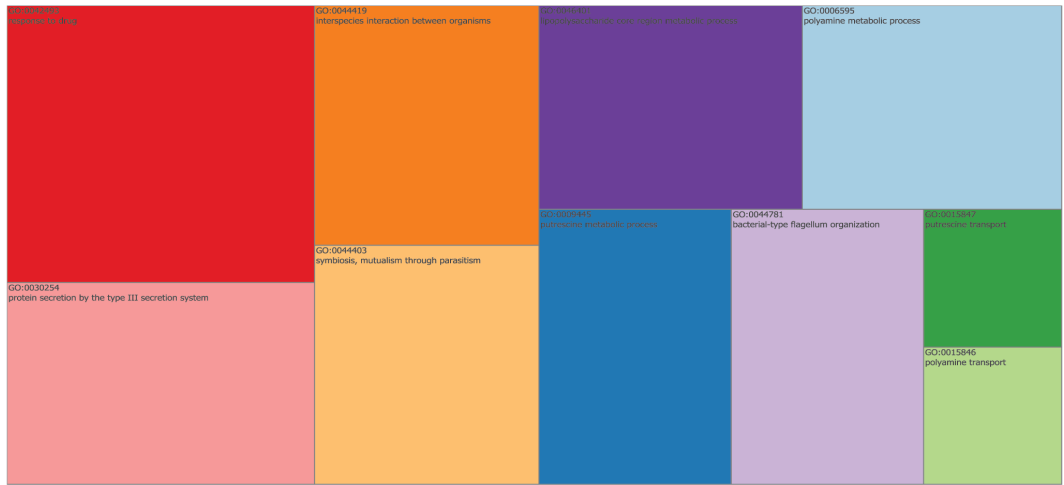

B

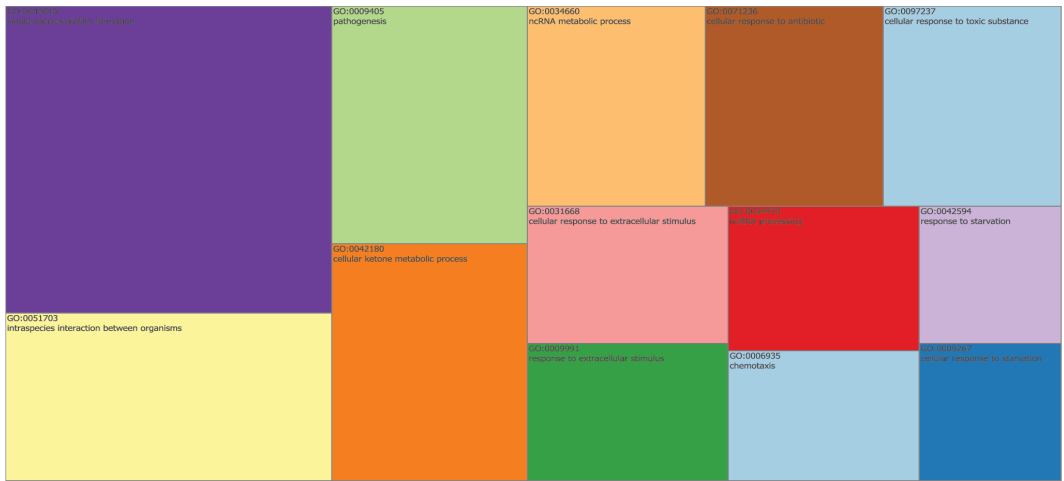

C

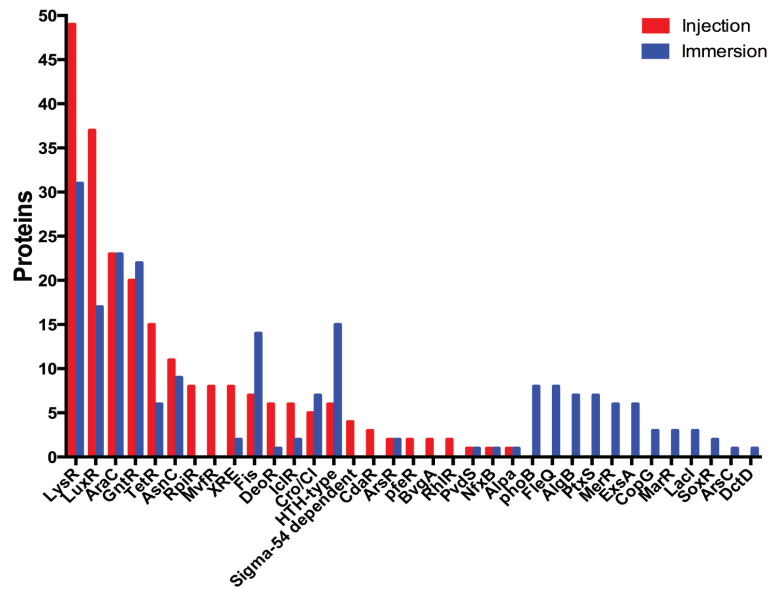

Figure 5

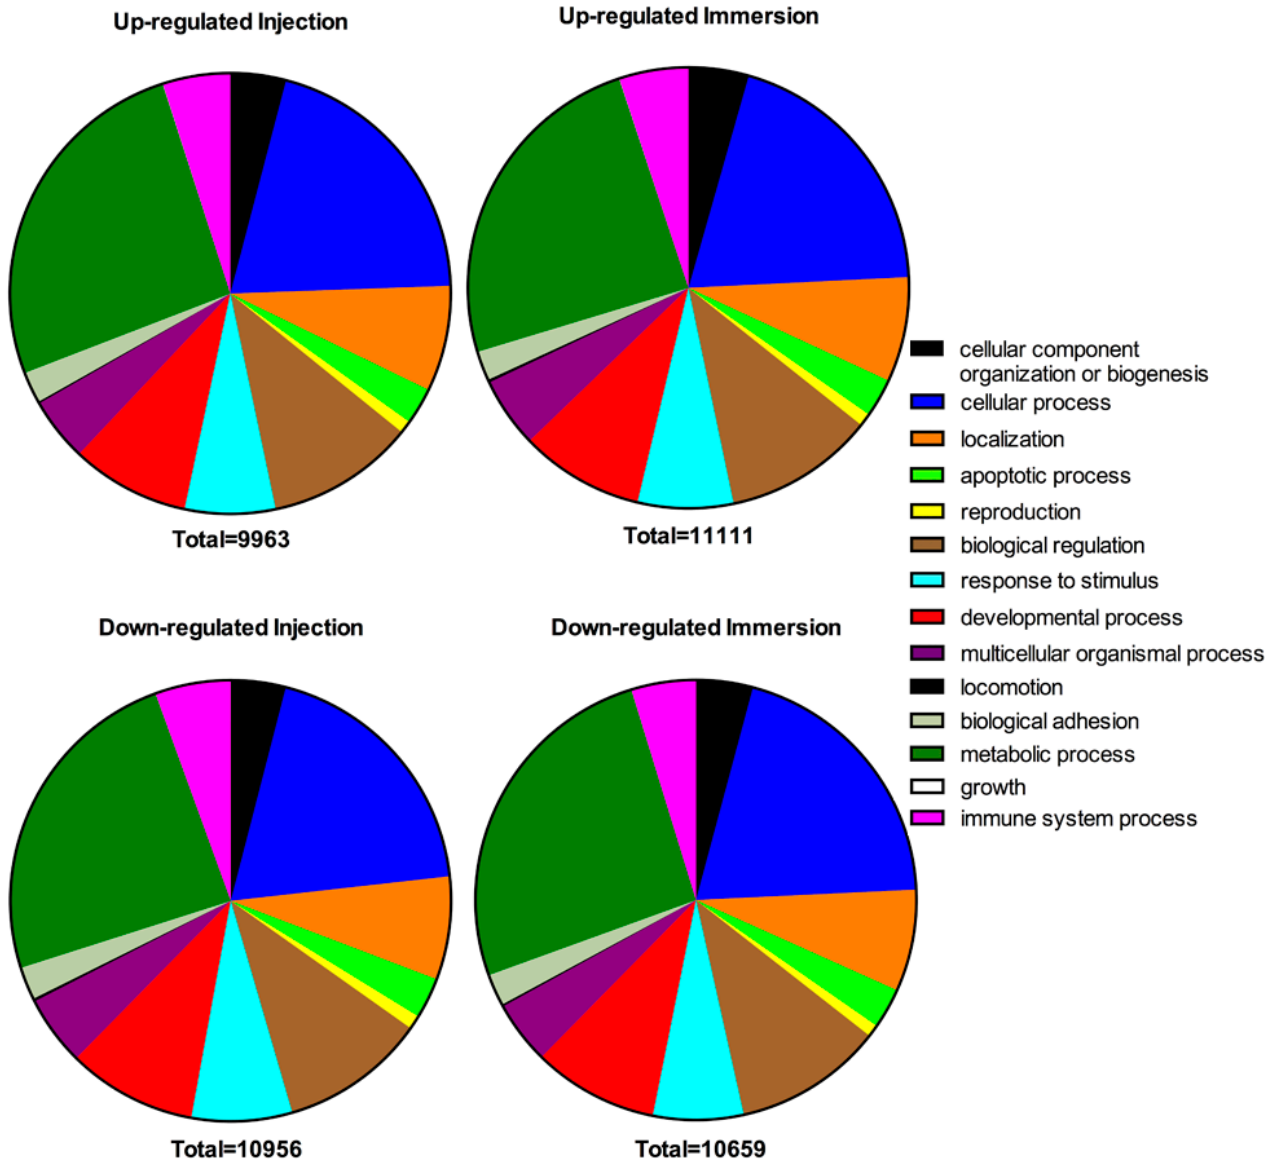

**Supplementary Figure 1**

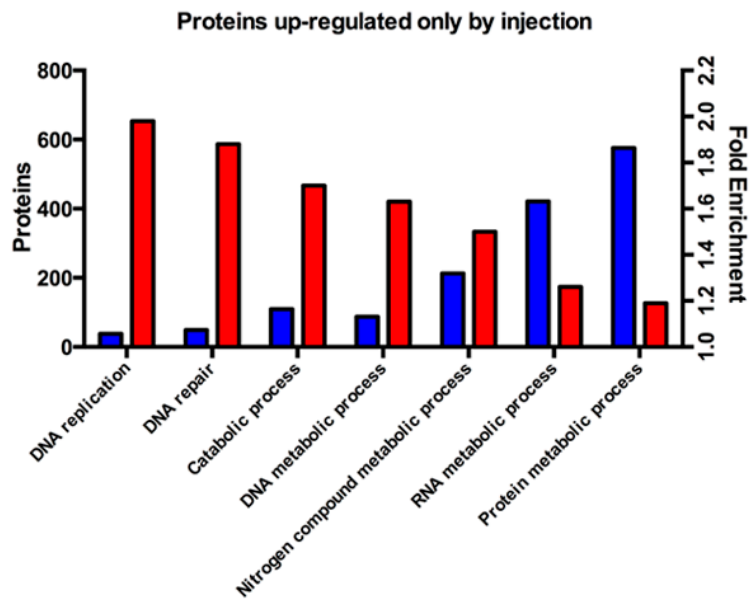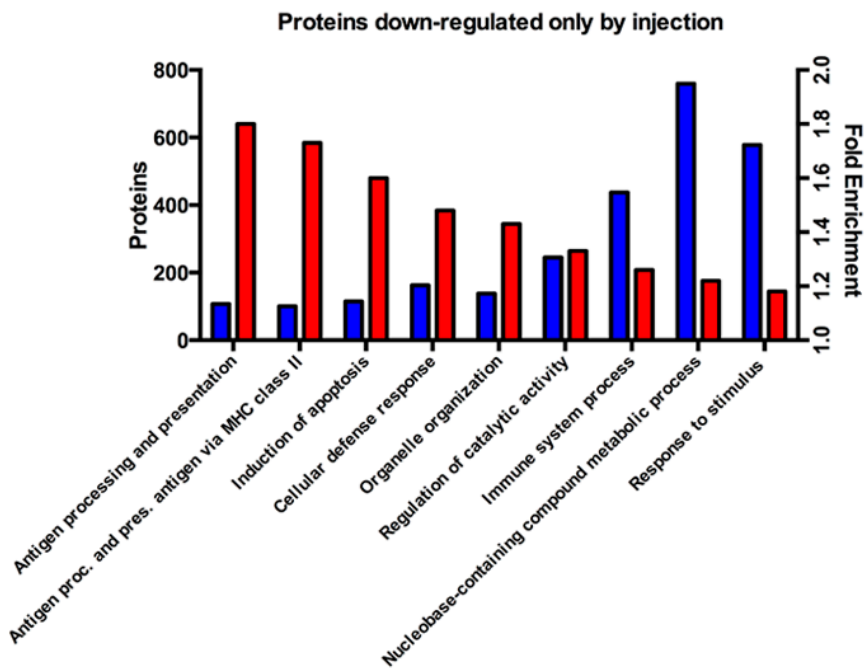

**Supplementary Figure 2**

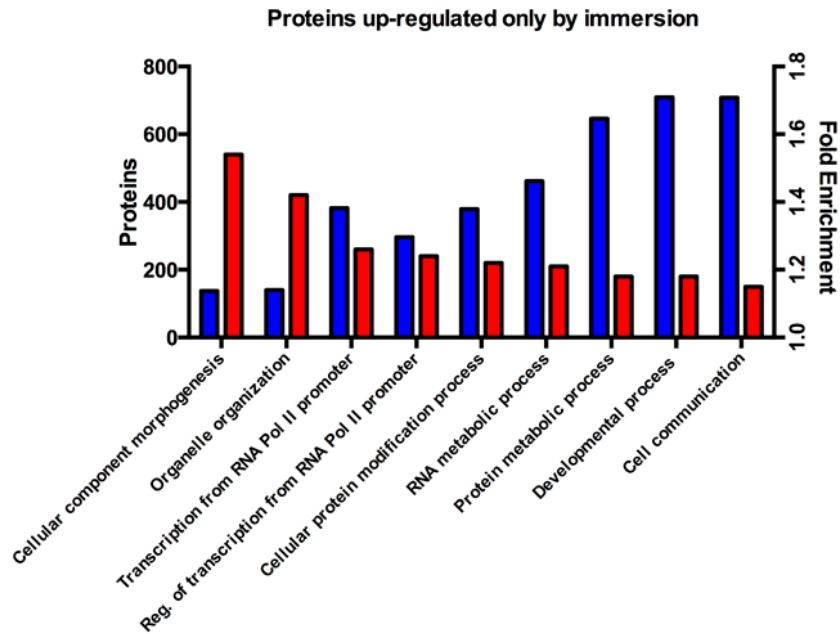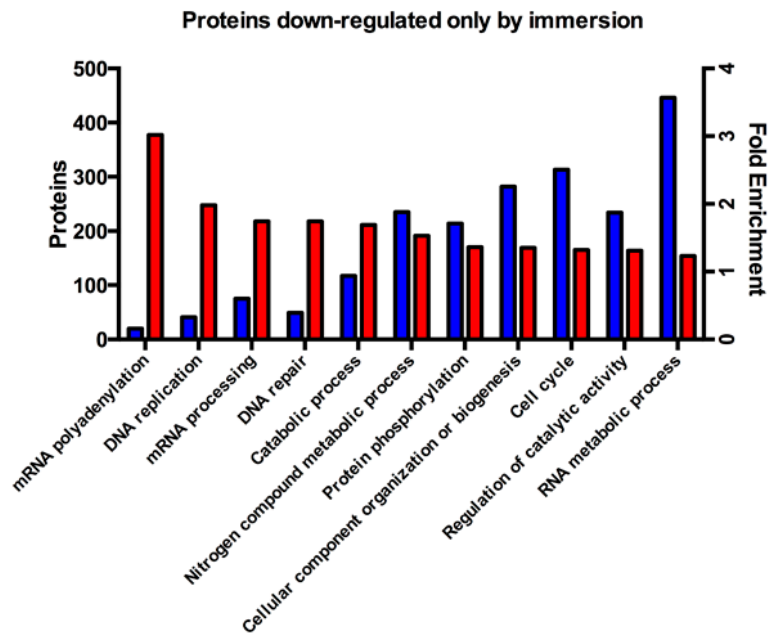

**Supplementary Figure 3**
